# Supplementary material for: Competition-driven eco-evolutionary feedback reshapes bacteriophage lambda’s fitness landscape and enables speciation
Source: PubMed Central journal article supplement (PMC10825149; doi:10.1038/s41467-024-45008-5), 2024-01-29
Supplement: 41467_2024_45008_MOESM1_ESM.pdf [file 41467_2024_45008_MOESM1_ESM.pdf]

Supplementary Figures and Tables for:

**Competition-driven eco-evolutionary feedback reshapes bacteriophage lambda's fitness landscape and enables speciation**

Michael B. Doud, Animesh Gupta, Victor Li, Sarah J. Medina, Caesar A. De La Fuente, Justin R. Meyer

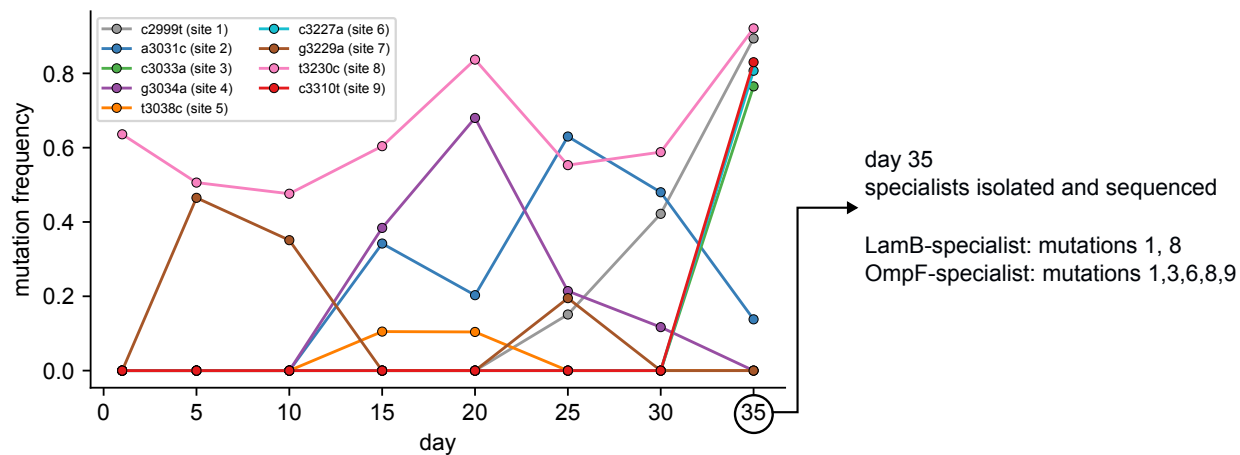

**Supplementary Figure 1: Nine *J* mutations were sampled during  $\lambda$ 's evolution from a generalist into two specialists.** Mutations within the *J* gene were detected by population sequencing of  $\lambda$  every 5 days during its laboratory evolution from a generalist (EvoC) into co-existing receptor specialists. At the end of the experiment, two specialist viruses: one LamB-specialist (Specialization Index  $0.99986 \pm 0.0002$  s.d.) and one OmpF-specialist (Specialization Index  $-0.9919 \pm 0.0029$  s.d.) were isolated by plaque purification and the full *J* gene was sequenced for each. The nine mutations observed throughout the course of the laboratory evolution experiment were used as the basis for the design of the combinatorial mutant virus library used to measure fitness landscapes.

| <u>sample</u>    | <u>total reads</u> | <u>retained reads</u> | <u>total barcodes</u> | <u>retained barcodes</u> | <u>genotypes observed</u> | <u>genotypes observed (%)</u> |
|------------------|--------------------|-----------------------|-----------------------|--------------------------|---------------------------|-------------------------------|
| lyso_1a          | 31349993           | 29995832              | 10874179              | 1792161                  | 256/256                   | 100%                          |
| lyso_1b          | 29503891           | 28226421              | 11013981              | 1887681                  | 256/256                   | 100%                          |
| lyso_2a          | 29720106           | 28394961              | 9574206               | 1600581                  | 256/256                   | 100%                          |
| lyso_2b          | 29753717           | 28424481              | 9584166               | 1636865                  | 256/256                   | 100%                          |
| LibA_pre         | 21536758           | 20322420              | 9615680               | 1504884                  | 512/512                   | 100%                          |
| LibA_vGen_1      | 18485491           | 17421123              | 7732259               | 1286293                  | 362/512                   | 71%                           |
| LibA_vGen_2      | 18484112           | 17349530              | 7393032               | 1278832                  | 347/512                   | 68%                           |
| LibA_vGen_3      | 18059625           | 17001858              | 7353352               | 1284544                  | 345/512                   | 67%                           |
| LibA_vGen_LamB_1 | 18121384           | 16984788              | 6304149               | 1032342                  | 495/512                   | 97%                           |
| LibA_vGen_LamB_2 | 20548272           | 19373665              | 9263231               | 1474078                  | 499/512                   | 97%                           |
| LibA_vGen_LamB_3 | 28016680           | 26403612              | 11034429              | 1306940                  | 498/512                   | 97%                           |
| LibA_vGen_OmpF_1 | 18440873           | 17399028              | 7759028               | 1311059                  | 243/512                   | 47%                           |
| LibA_vGen_OmpF_2 | 18308966           | 17243123              | 7658868               | 1262205                  | 242/512                   | 47%                           |
| LibA_vGen_OmpF_3 | 21257346           | 20062589              | 8431809               | 1349872                  | 263/512                   | 51%                           |
| LibA_vLspec_1    | 18228661           | 17193555              | 7117515               | 1232751                  | 385/512                   | 75%                           |
| LibA_vLspec_2    | 22721312           | 21425682              | 9218174               | 1361693                  | 386/512                   | 75%                           |
| LibA_vLspec_3    | 19063825           | 17933074              | 7432207               | 1201921                  | 379/512                   | 74%                           |
| LibA_vOspec_1    | 21524743           | 20340163              | 9150654               | 1314347                  | 452/512                   | 88%                           |
| LibA_vOspec_2    | 21625936           | 20402090              | 9174995               | 1417534                  | 449/512                   | 88%                           |
| LibA_vOspec_3    | 19562975           | 18432341              | 8910946               | 1479550                  | 460/512                   | 90%                           |
| LibB_pre         | 17314019           | 16277950              | 7924903               | 1375623                  | 512/512                   | 100%                          |
| LibB_vGen_1      | 20334575           | 19169617              | 9178354               | 1464099                  | 397/512                   | 78%                           |
| LibB_vGen_2      | 21043423           | 19871734              | 8334883               | 1396798                  | 380/512                   | 74%                           |
| LibB_vGen_3      | 19619831           | 18357858              | 7790406               | 1189626                  | 373/512                   | 73%                           |
| LibB_vGen_LamB_1 | 19519430           | 18330598              | 8249694               | 1368665                  | 451/512                   | 88%                           |
| LibB_vGen_LamB_2 | 18545775           | 17403933              | 7979985               | 1186832                  | 441/512                   | 86%                           |
| LibB_vGen_LamB_3 | 20855525           | 19653015              | 8778775               | 1360703                  | 437/512                   | 85%                           |
| LibB_vGen_OmpF_1 | 18081193           | 16953548              | 7952547               | 1317043                  | 281/512                   | 55%                           |
| LibB_vGen_OmpF_2 | 25088144           | 23644340              | 10732714              | 1386740                  | 300/512                   | 59%                           |
| LibB_vGen_OmpF_3 | 19434449           | 18283488              | 8405639               | 1418911                  | 287/512                   | 56%                           |
| LibB_vLspec_1    | 19713303           | 18572765              | 8341297               | 1368128                  | 421/512                   | 82%                           |
| LibB_vLspec_2    | 24433641           | 23071220              | 10308241              | 1508562                  | 426/512                   | 83%                           |
| LibB_vLspec_3    | 18427735           | 17319573              | 8133495               | 1400231                  | 423/512                   | 83%                           |
| LibB_vOspec_1    | 16508416           | 15529520              | 7959310               | 1331473                  | 463/512                   | 90%                           |
| LibB_vOspec_2    | 17624666           | 16551923              | 7899799               | 1353259                  | 460/512                   | 90%                           |
| LibB_vOspec_3    | 20110236           | 18938251              | 8370929               | 1369186                  | 467/512                   | 91%                           |

**Supplementary Table 1: Summary of sequencing read depth and representation of combinatorial genotypes within each sample.** Total reads reflects the total number of paired-end sequencing reads; retained reads reflect the number of reads remaining after initial quality control; total barcodes refers to the number of unique molecular barcode sequences observed within each sample; retained barcodes refers to the number of unique molecular barcodes that were observed multiple times in order to correct for sequencing errors by building a consensus genotype sequence per barcode. The number of retained barcodes is the effective sequencing depth. Genotypes observed refers to how many of the 512 combinatorial genotypes were observed in each sample; note that the lysogen library samples (lyso\_\*) are sub-libraries which, by construction, only contain mutations across 8 of the 9 sites, thus the maximum number of genotypes in each sub-library is 256.

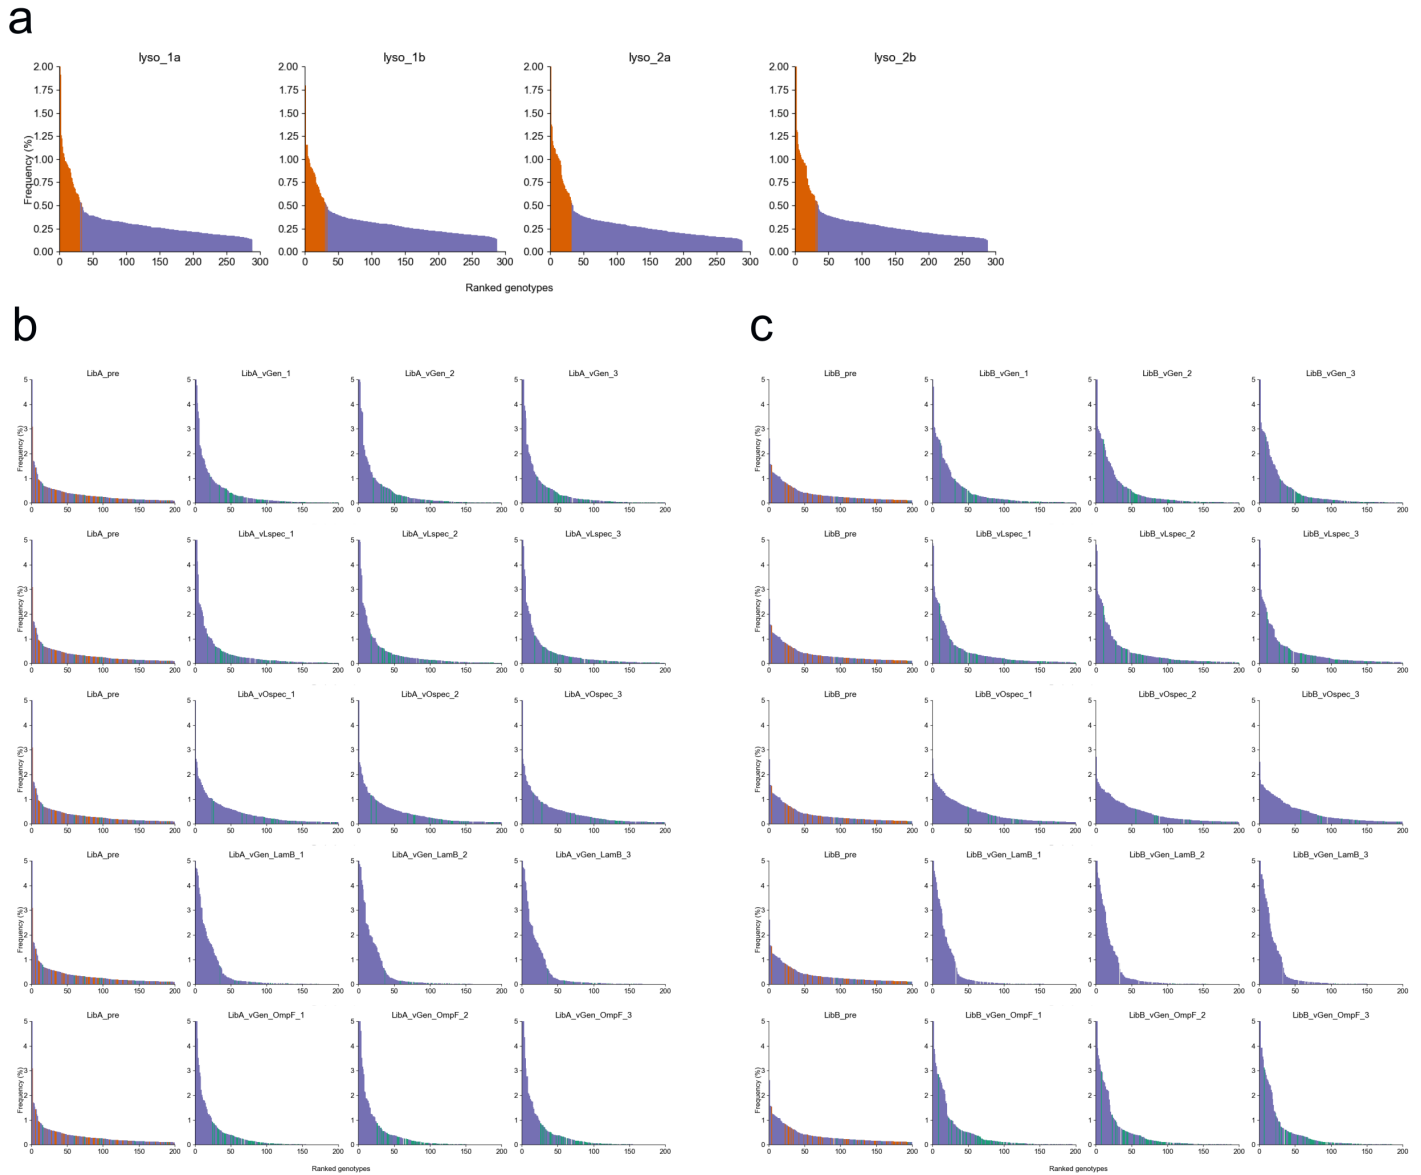

**Supplementary Figure 2: Library genotype representation across samples.** Genotypes are ordered on the x-axis by frequency rank, and the observed frequency (%) is plotted on the y-axis. Genotypes are colored purple if they are part of the combinatorial library design, red if containing a stop codon in J that was engineered into the pre-mutagenesis sequence for the purposes of purging genotypes that failed to undergo recombination during MAGE, teal if containing the c3283t mutation (note this nucleotide site is not covered in the sequencing amplicon used for the lysogen library samples in panel A), and grey if any other mutation is present in the sequence. **a**, Lysogen sub-libraries sample all 256 intended combinatorial genotypes (purple) at a nearly uniform frequency. Stop-codon containing genotypes (products of incomplete recombination during MAGE) are, as expected, the most frequently observed genotypes. **b, c**, Genotype representation in pre- and post-competition samples for experiments using independently generated virus libraries A (panel B) and B (panel C). Only the 200 most frequent genotypes are plotted for each sample. The pre-competition samples (left-most columns) contain significant numbers of stop-codon containing genotypes (red) due to incomplete purifying selection during the initial induction of viruses from lysogens. After competition experiments (three replicates performed for each condition – rightmost three columns for each panel) there are no longer appreciable levels of stop-codon genotypes, as expected. Some genotypes containing the c3283t mutation (teal) reach appreciable frequencies after competition in some conditions, but the combinatorial library genotypes (purple) dominate in all samples.

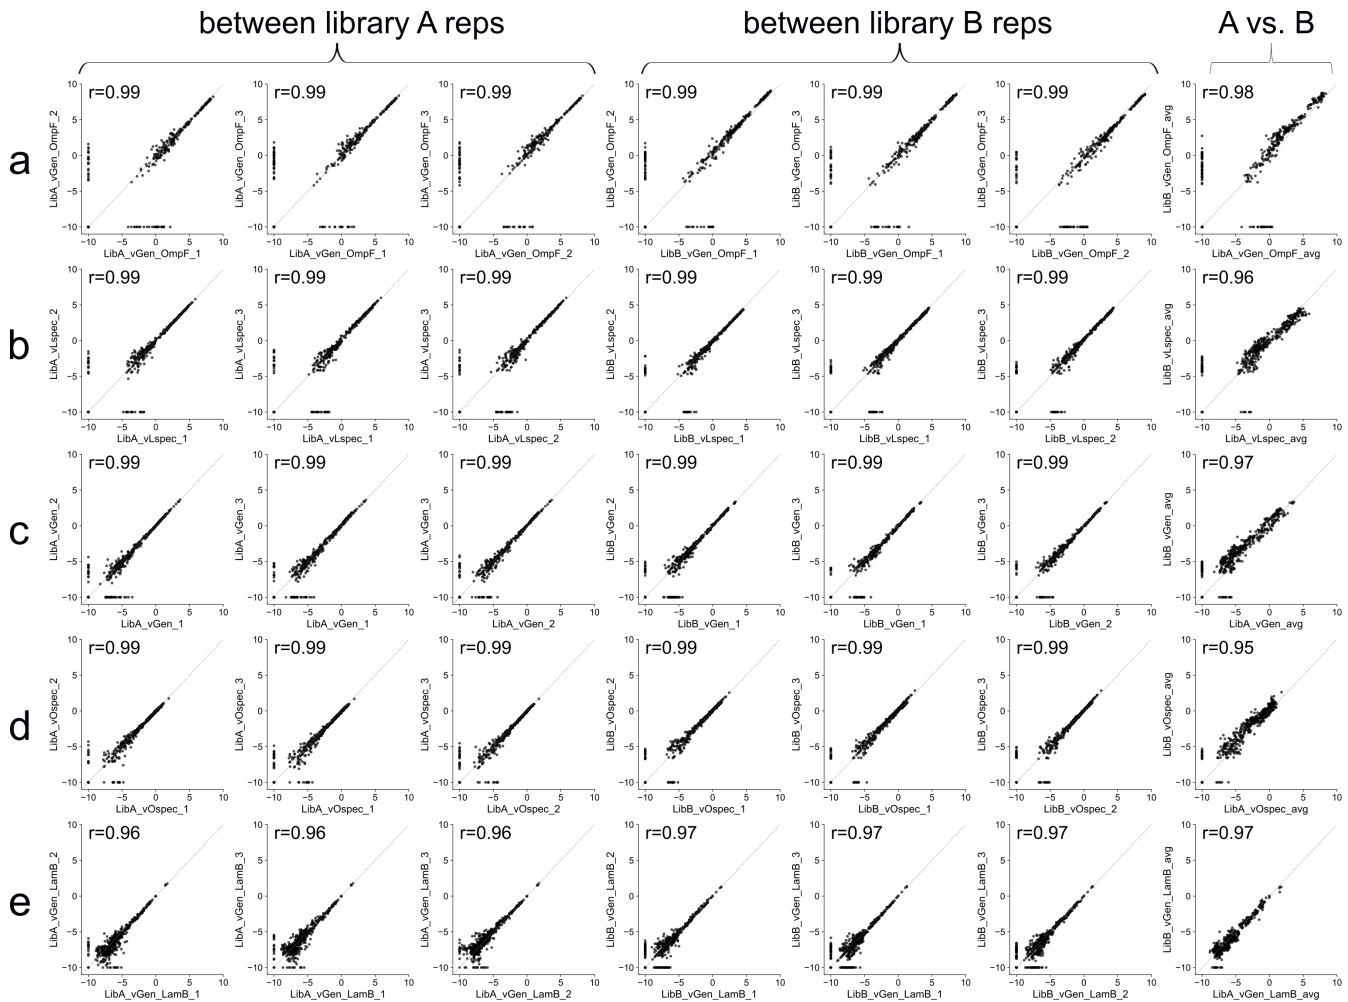

**Supplementary Figure 3: Fitness landscape measurements are highly reproducible.** Each plot shows the correlation in the measured genotype fitness across the 512 genotypes in the library with the corresponding Pearson's  $r$  calculated only across the genotypes that were observed in both replicates. Points are plotted at -10 if the genotype was not observed in the corresponding sample. Shown are the correlations across replicate competition flasks using the same library ("between library A reps" and "between library B reps" columns) and between the two libraries ("A vs. B" column). **a**, Competing the library against the generalist with only OmpF<sup>+</sup> cells present. **b**, Competing the library against the L-specialist with both cell types. **c**, Competing the library against the generalist with both cell types. **d**, Competing the library against the O-specialist with both cell types. **e**, Competing the library against the generalist with only Lamb<sup>+</sup> cells present. The environments of competition experiments listed in A-E correspond to those in Fig. 3.

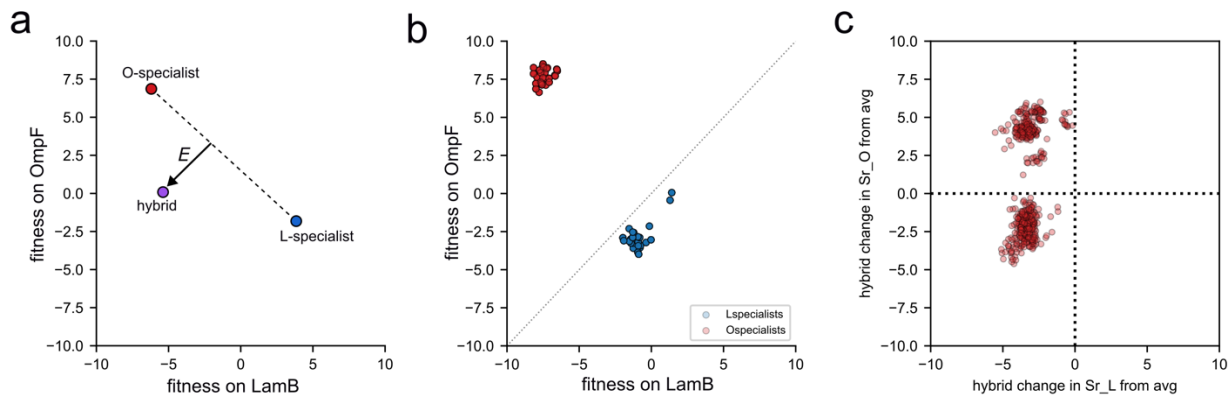

**Supplementary Figure 4: Geometric interpretation of fitness effects as a result of hybridization between two specialists. a,** Schematic of a theoretical example trio of an O-specialist, an L-specialist, and the resulting hybrid. The dotted line between the two specialists represents an expectation of even compensatory changes in the fitness on one receptor for the other. When the hybrid falls off this line, we compute the distance “ $E$ ” from the line to the hybrid, representing the average change in hybrid fitness from the average of the specialists; in the orientation shown the sign is negative, but if the hybrid is above/to the right of the dotted line the sign is positive. **b,** Fitness of the top 27 specialists of each type used in hybridization analyses. The distribution of “ $E$ ” across all pairwise comparisons of the top 27 specialists of both types is what is plotted in Fig. 2d. **c,** Hybrid genotypes nearly always have loss of fitness on LamB from the parental strains, but the effects of fitness on OmpF are variable.

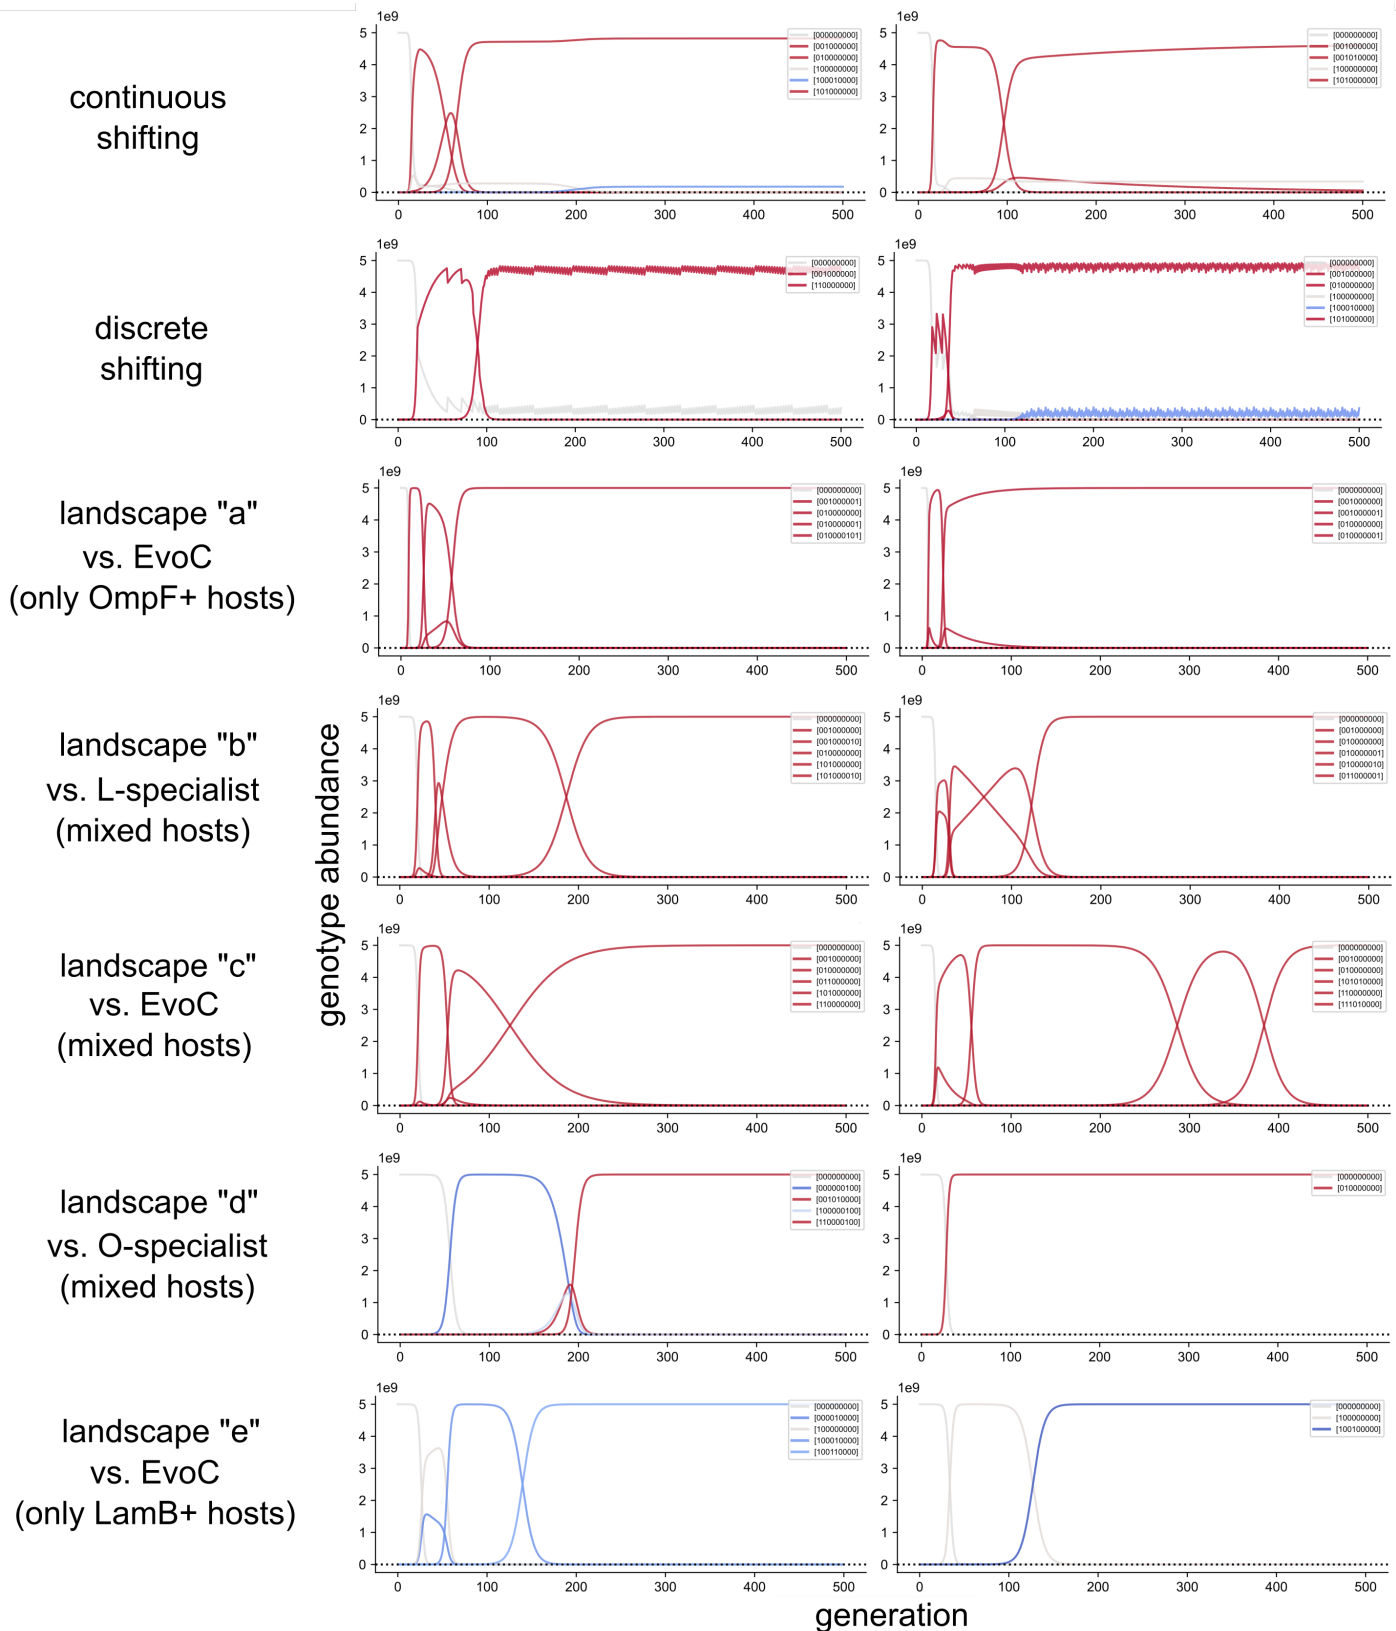

**Supplementary Figure 5: Representative population genetic dynamic plots for two simulations under each landscape model.** The abundance of each  $\lambda$  genotype is plotted across 500 generations and genotypes are colored by specialization index (as in Fig. 2b; specialization towards OmpF is red and specialization towards LamB is blue). Genotypes are indicated in the legends by a string of nine '0' and '1' characters, representing the ancestral (0) or derived (1) nucleotide at each of the nine mutation sites. Notably, there is genetic heterogeneity maintained under both shifting models; OmpF-specialists dominate in all shifting models, and depending on the simulation either a LamB-specialist or a generalist coexists at a lower frequency. Results of genotypic and phenotypic diversity aggregated across 500 replicate simulations under each model are summarized in Fig. 4. The discrete shifting model produces a characteristic sawtooth-wave like pattern in population abundances as a result of the discrete shifts back and forth between two governing fitness landscapes.

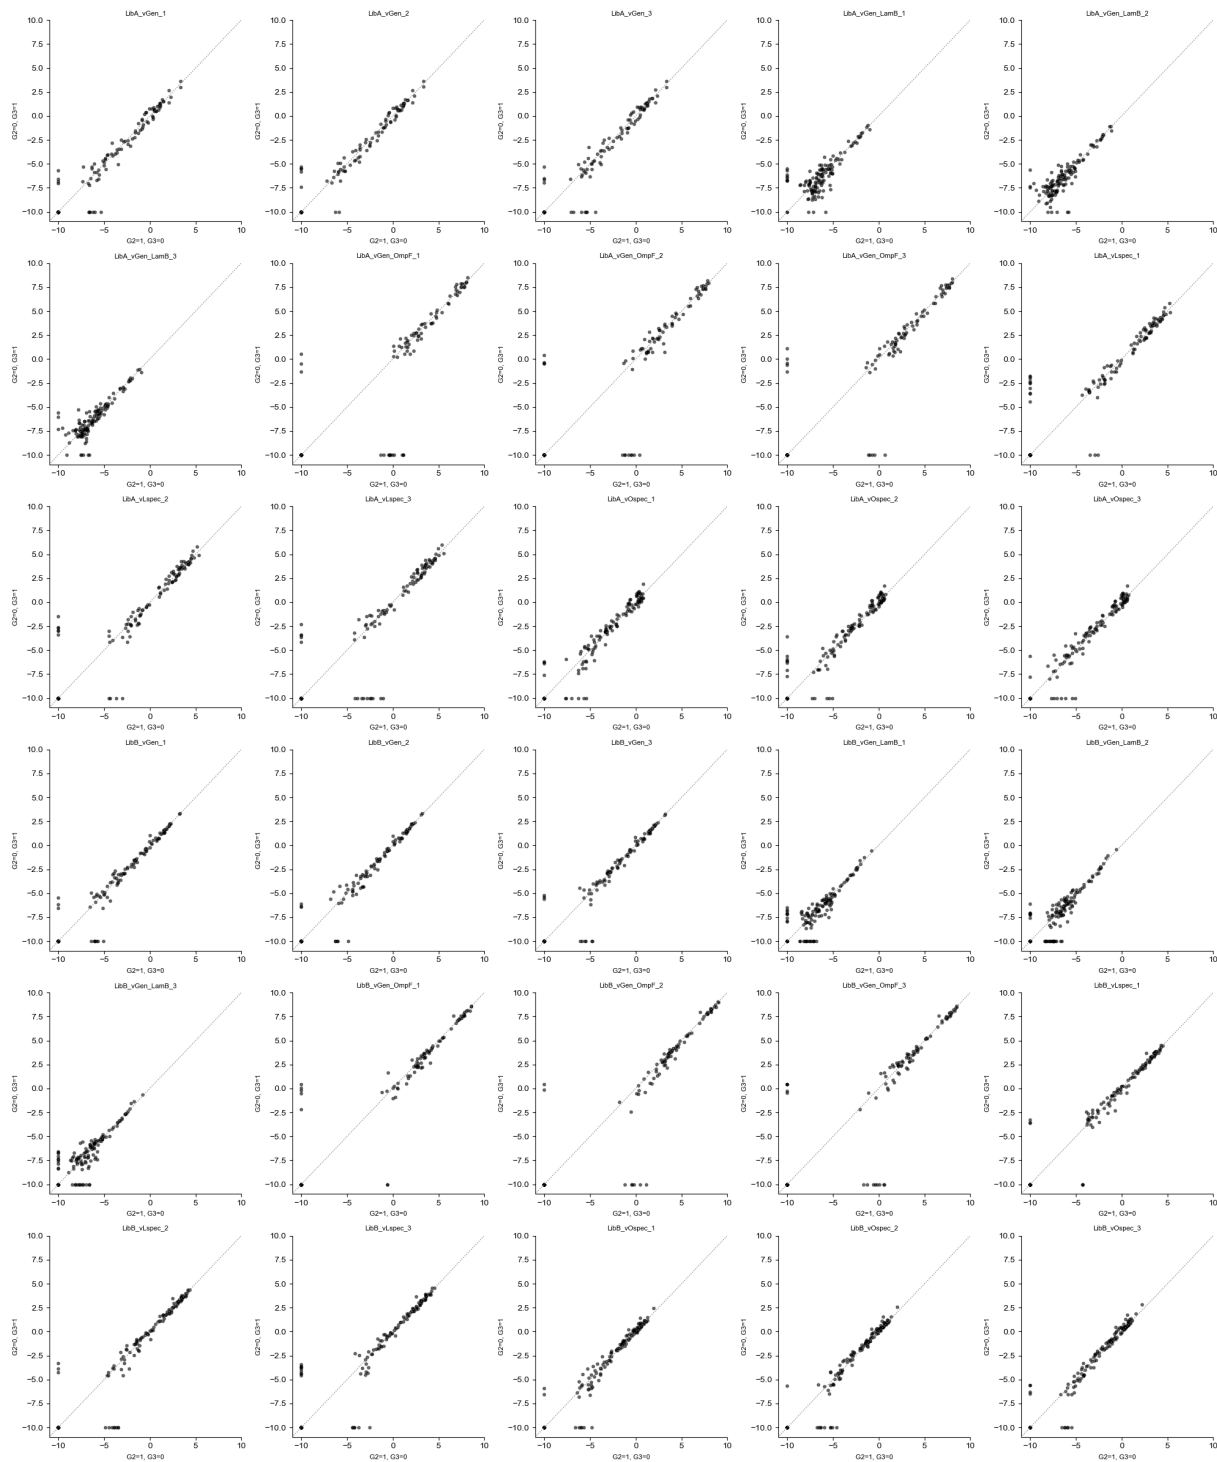

**Supplementary Figure 6: Mutations 2 and 3 have similar fitness effects regardless of their genetic background or ecological context.** Mutations at sites 2 and 3 are synonymous with each other (each alone, or in combination, produce the same amino-acid change in the protein sequence) and the fitness of genotypes with either mutation 2 or mutation 3 are highly correlated. X-axis: G2=1, G3=0; Y-axis: G2=0, G3=1. Points are plotted at -10 if the genotype was not observed in the corresponding sample. This is similar to Supplementary Figure 7 but shows the fitness effects of the isolated mutation 3 (without mutation 2) on the y-axis.



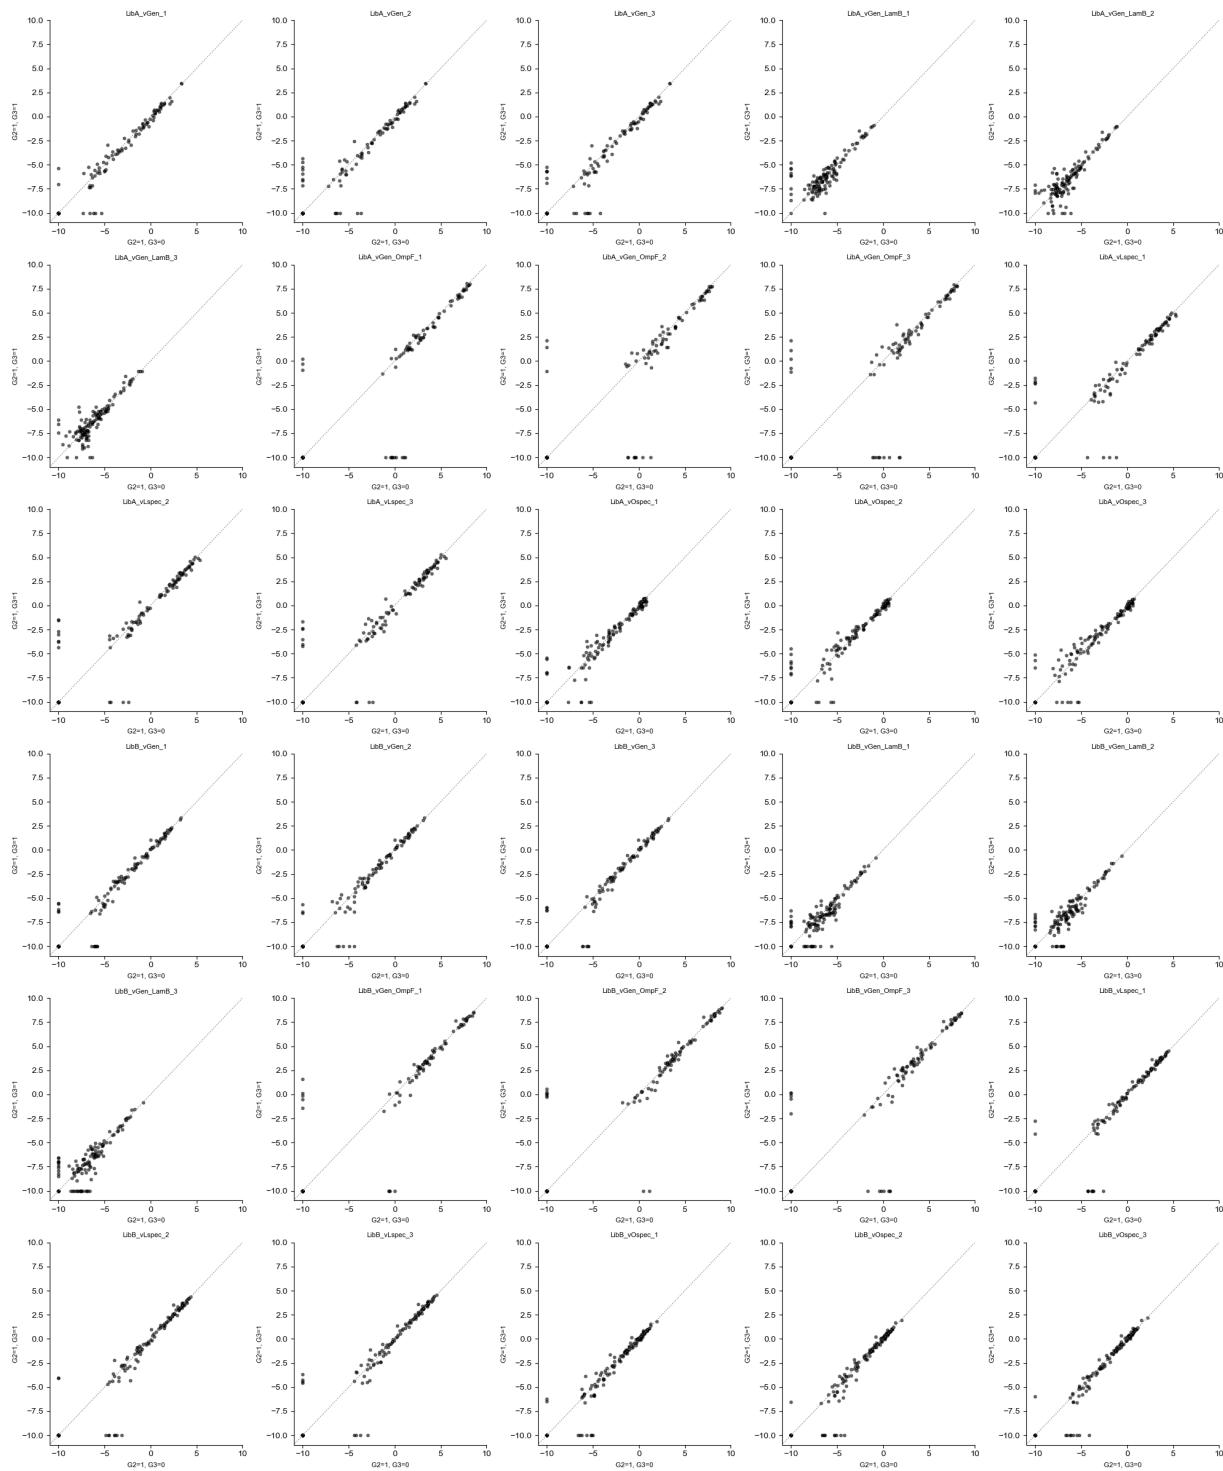

**Supplementary Figure 7: Mutations 2 and 2+3 have similar fitness effects regardless of their genetic background or ecological context.** Mutations at sites 2 and 3 are synonymous with each other (each alone, or in combination, produce the same amino-acid change in the protein sequence) and the fitness of genotypes with mutation 2 are highly correlated with that of genotypes with the combination of mutations 2 and 3. X-axis: G2=1, G3=0; Y-axis: G2=1, G3=1. Points are plotted at -10 if the genotype was not observed in the corresponding sample. This is similar to Supplementary Figure 6 but shows the fitness effects of the combined mutations 2+3 on the y-axis.

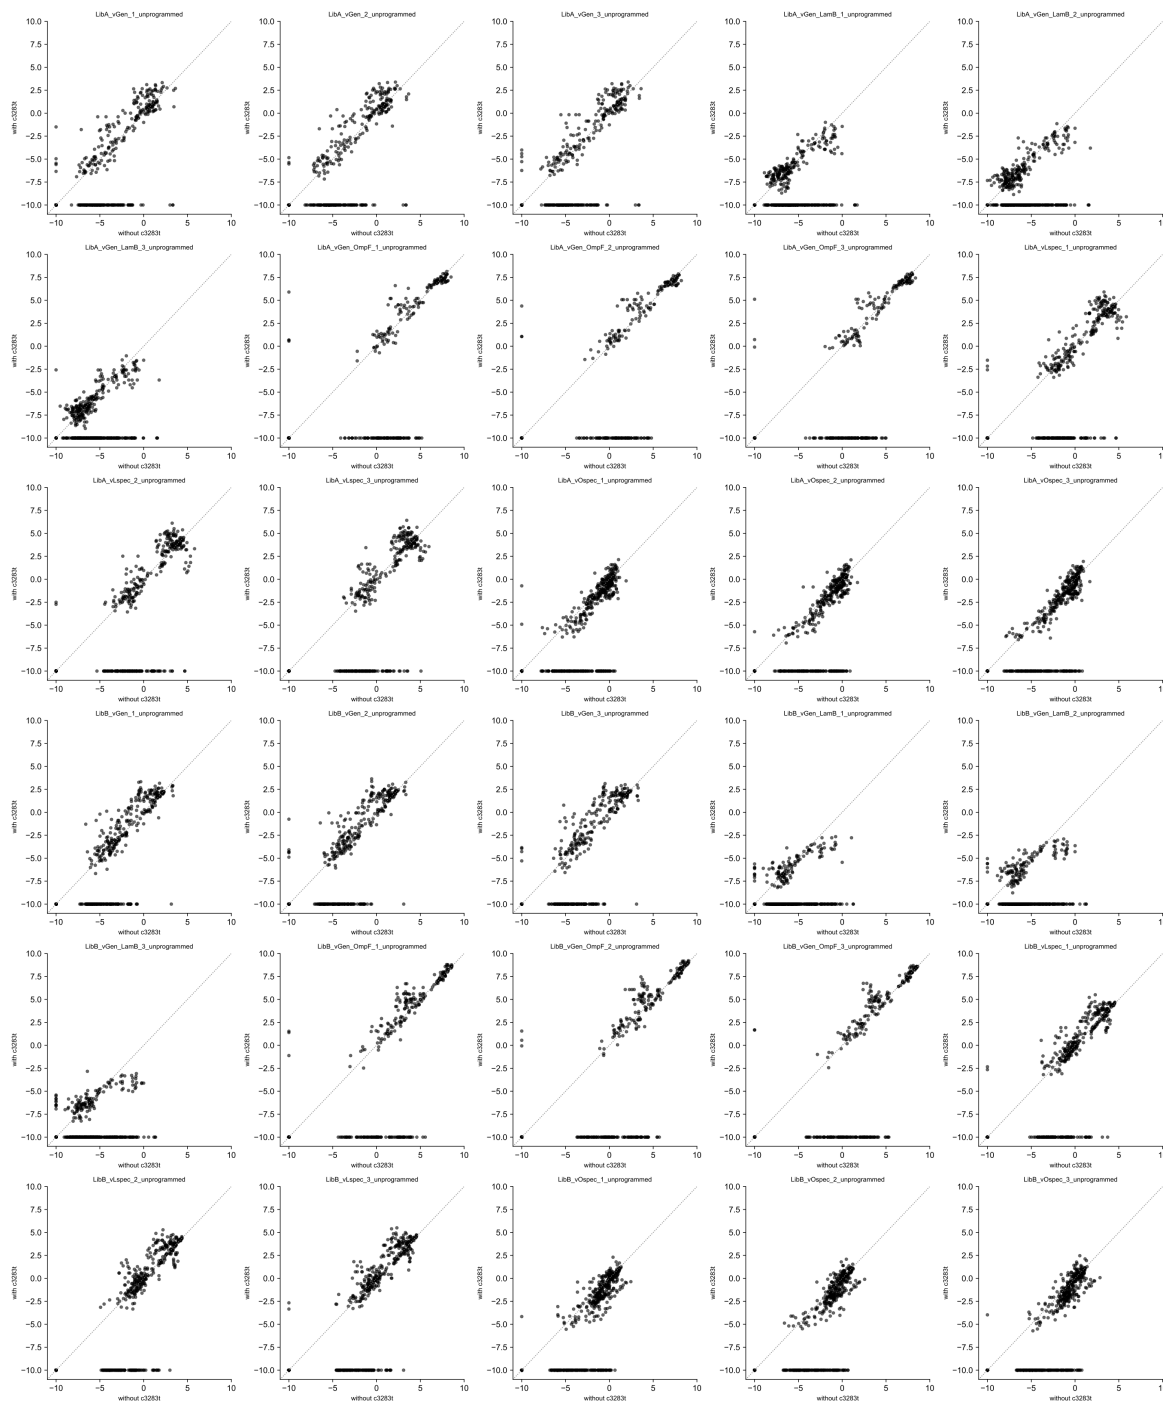

**Supplementary Figure 8: Fitness effects of the c3283t mutation.** This mutation is not one of the 9 combinatorial mutation sites but was observed at modest frequencies in the pre- and post- competition experiments (Supplementary Figure 2). This mutation was likely present in a minor frequency prior to mutagenesis. Each plot shows the correlation between fitness (selection rate) of a genotype without the c3283t mutation (x-axis) against the fitness of the corresponding genotype with the mutation (y-axis). Points are plotted at -10 if the genotype was not observed in the corresponding sample. Overall, the fitness of genotypes with and without this mutation are moderately correlated, although there appear to be many genotypes that did not have a measured fitness with the mutation (points at  $y=-10$ ), indicating either strongly deleterious effects of the mutation or lack of representation in the original library construction (we cannot exclude the latter possibility because the sequencing amplicon for the lysogen samples does not cover this nucleotide site). We focus the remaining analysis in this study only on the programmed combinatorial genotypes without extra mutations (c3283t or otherwise).

**a**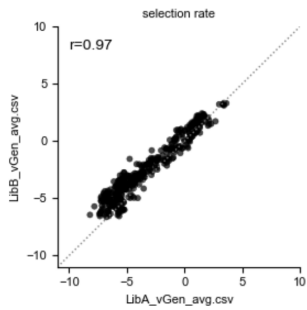**b**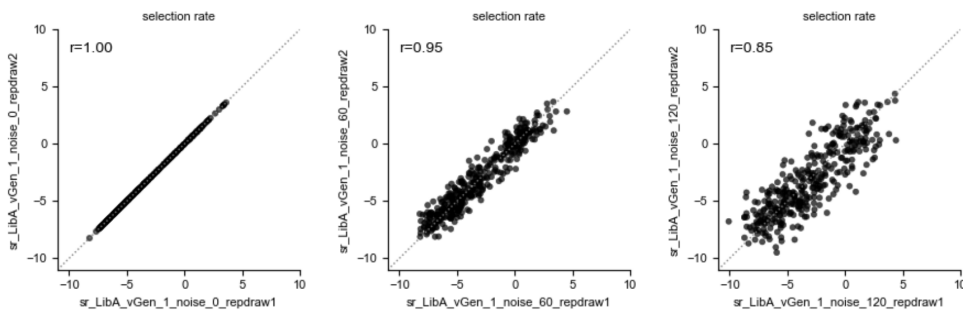

**Supplementary Figure 9: Tuning the scale parameter of normally distributed noise added to the fitness landscapes used in replicate simulations of evolution.** **a**, The largest source of experimental noise is between landscapes measured using replicate virus libraries (also see final column of Supplementary Figure 3). **b**, The effect of adding normally distributed noise with scaling parameter of 0, 0.6, and 1.2. The fitness landscapes used to govern evolution in computer simulations were drawn from a distribution of landscapes such that replicate simulations use landscapes as similar to one another as the landscapes measured with biological replicate libraries by selecting a scale parameter (0.6, middle plot) that results in correlations similar to the experiments.

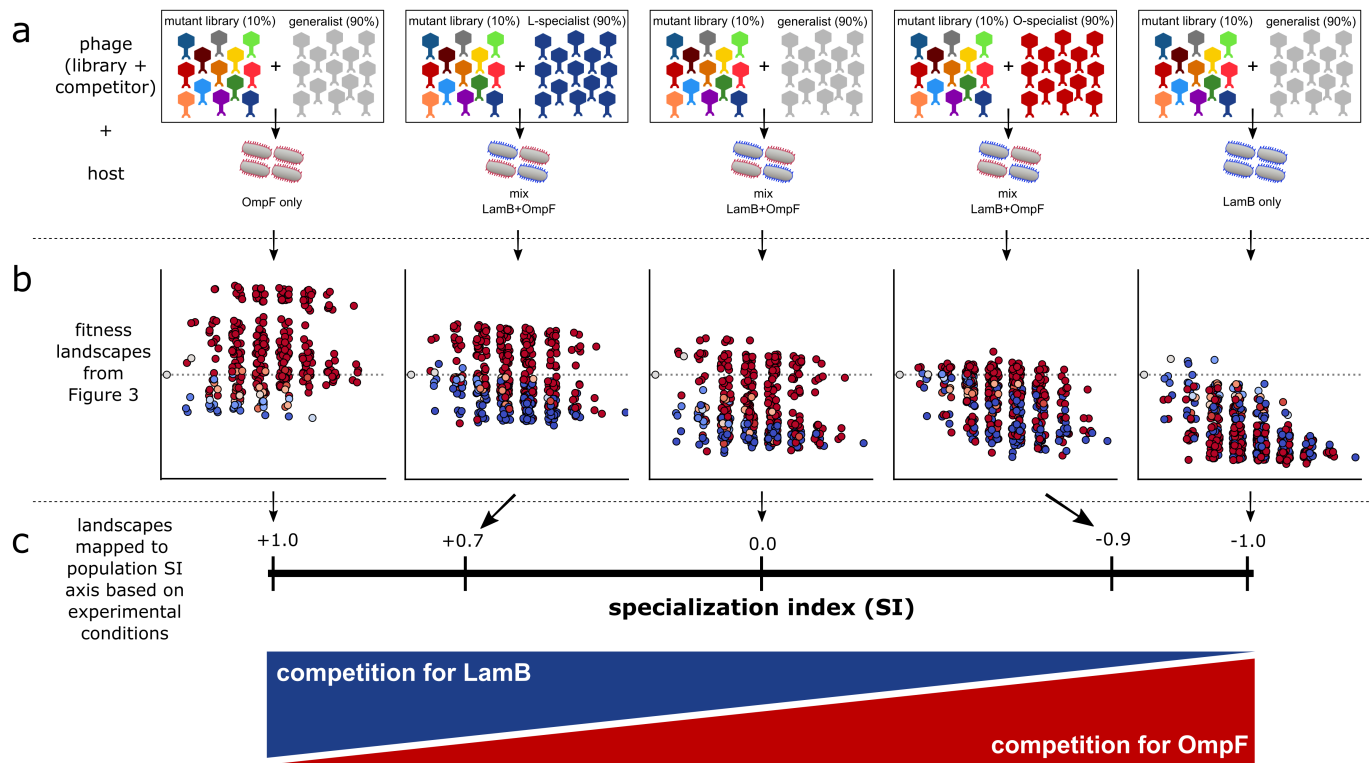

**Supplementary Figure 10: Mapping empirical fitness landscapes to a “landscape axis” by population specialization index (SI).**

**a**, The experimental conditions that defined each of the five competitive environmental contexts used to measure fitness landscapes; these environments varied by competitor virus and host cell types available for infection. **b**, The five fitness landscapes are reprised from Figure 3. **c**, As described in Methods, landscapes were positioned along a “landscape axis” based on the population SI in the respective experiments; the landscapes measured on a single host cell type were positioned at +1 and -1 since they represent the limiting cases of extreme competition for a receptor such that it is no longer available for infection. The positioning of the landscapes along this axis was used in the shifting models of evolutionary simulations such that the fitness values used to govern selection in each generation of the shifting models were updated either by continuous interpolation between the two adjacent landscapes or by discrete transitions to the nearest empirical landscape as the simulation population SI changed over time. As the population SI shifts to the left (representing more abundant L-specialists), competition for LamB intensifies, resulting in higher fitness values for OmpF-specialists, and vice-versa. In the *continuous shifting landscape simulation models*, the SI of the simulated population is used to position the population on the SI axis; if the population SI is equal to the SI of an empirical fitness landscape from Figure 3 then that landscape is used to govern selection during that generation, but most of the time the simulated population SI lies somewhere between two adjacent empirical landscapes and a linear interpolation of fitness values between the two empirical landscapes is used to determine fitness values to govern selection. In the *discrete shifting landscape simulation models*, the empirical landscape with the SI nearest to the simulation population SI is used.

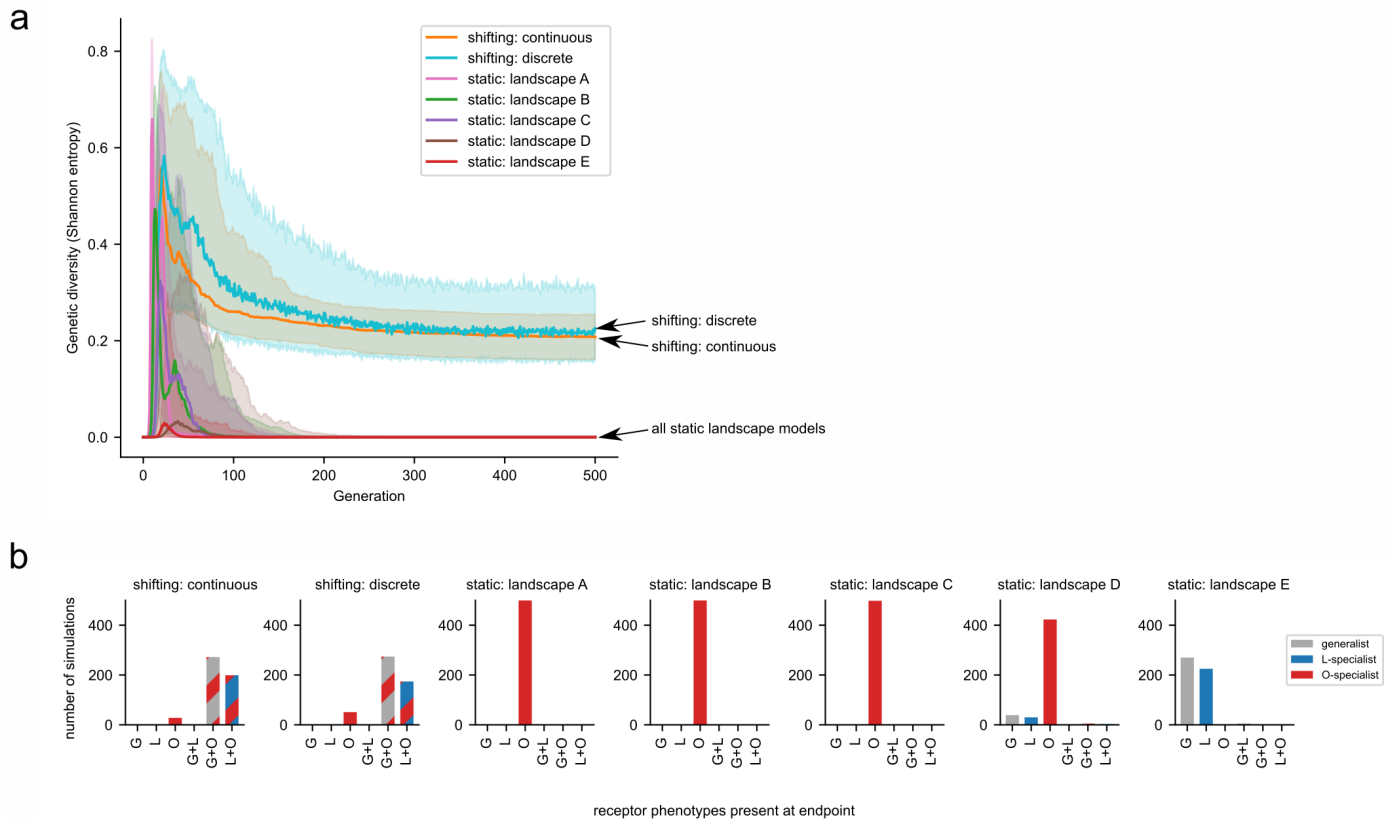

**Supplementary Figure 11: Both continuous and discrete shifting landscape models result in similar genetic and phenotypic diversity.** The same analysis of genetic and phenotypic diversity as presented in Fig. 4 is shown here, but in this figure the analysis includes the discrete shifting model. **a**, Genetic diversity computed at each generation; solid lines represent the median and shaded regions represent the interquartile range. The endpoint diversity for the models are labeled with arrows for clarity. **b**, Phenotypic diversity computed at the endpoint of each simulation. The number of simulations arriving at the designated combination of phenotypes ( $\geq 2.5\%$  abundance) is plotted.

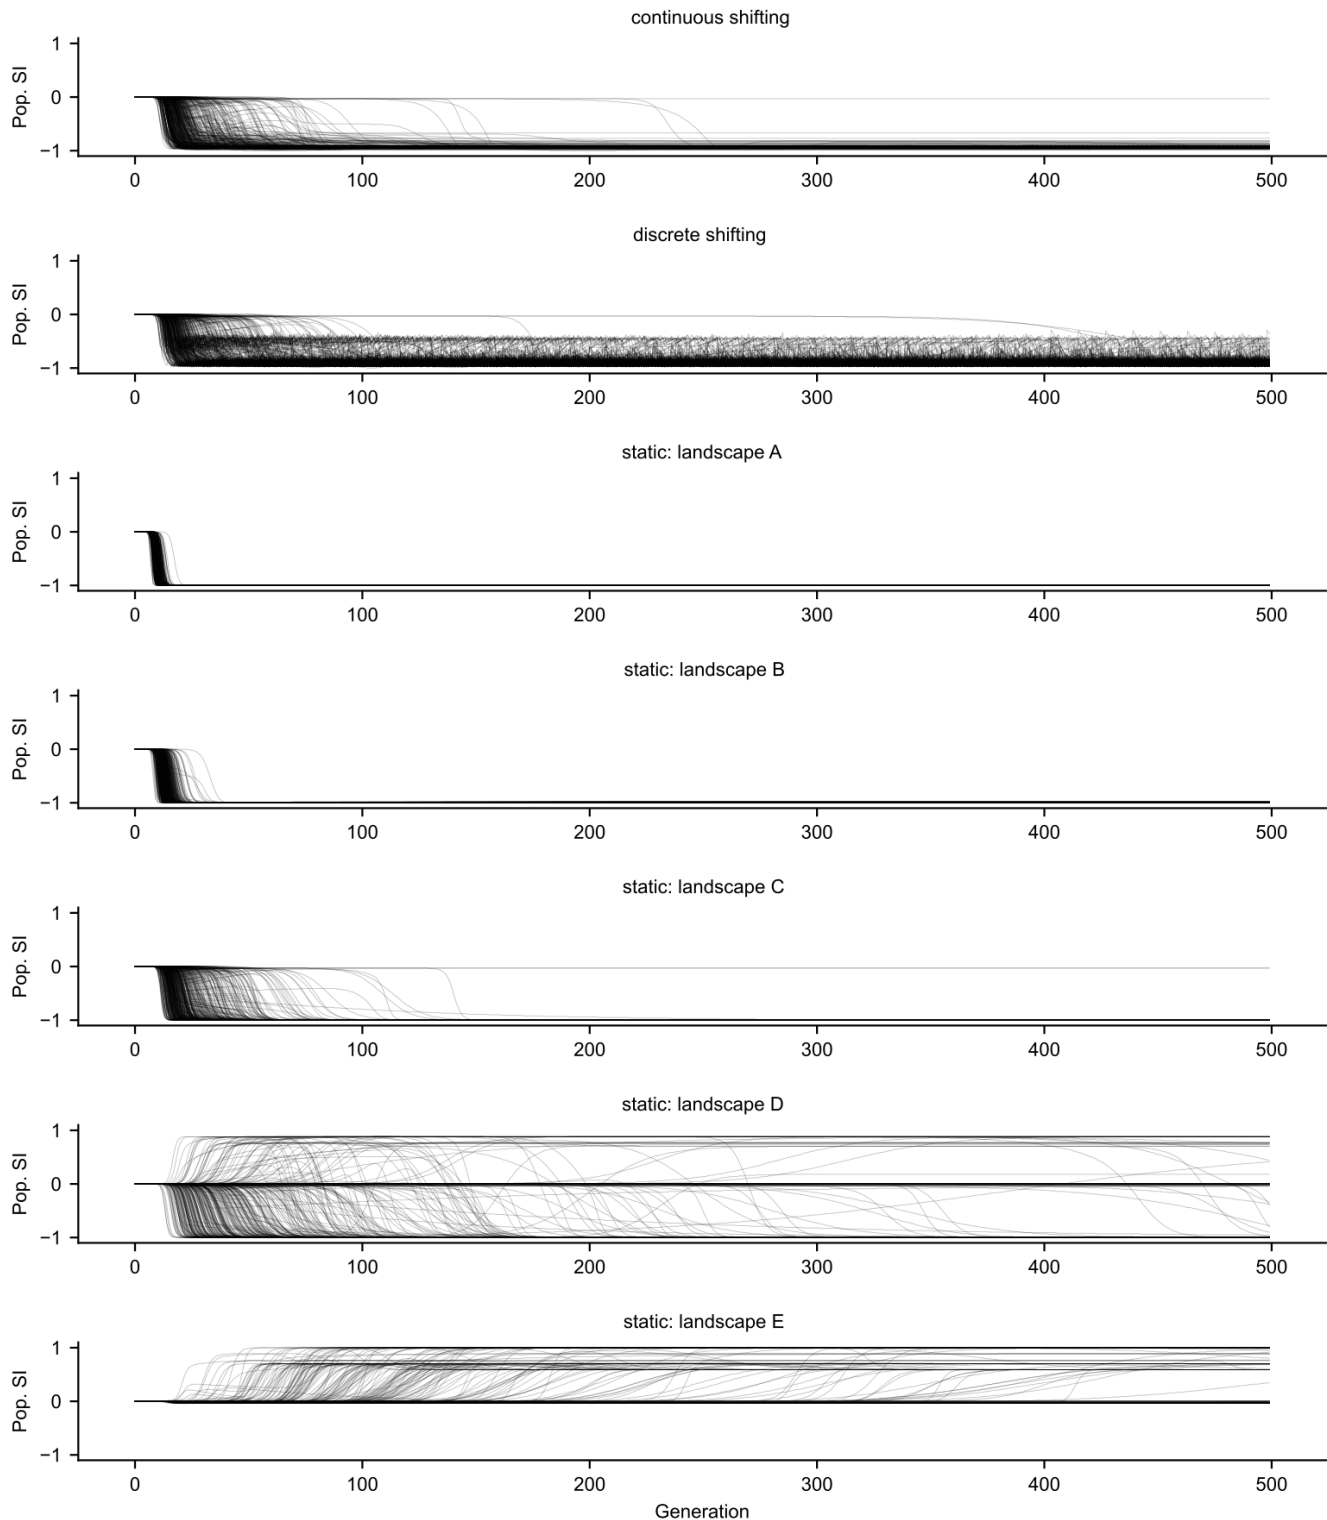

**Supplementary Figure 12: Trajectories of simulated population specialization index for all replicate simulations under each landscape model.** The population SI trajectory for each simulation is plotted as a semi-transparent line, for all 500 replicate simulations under each landscape model. The shifting landscape models tend to reach an equilibrium around a population SI between  $-0.9$  and  $-1.0$ , in contrast to the static models which tend to reach equilibrium SI near  $\pm 1.0$  as they become fixed with single specialist genotypes and phenotypes (as seen in Fig. 4; also see Supplementary Fig. 13 for trajectories of the median SI across simulations within each model). Landscapes A, B, and C all reach an endpoint with low genetic diversity dominated by O-specialists (as seen in Fig. 4, Supplementary Fig. 11), but the time it takes to reach this equilibrium is shortest in the most extreme competitive environment (landscape A, characterized by the highest fitness peaks of the dominating O-specialists). There is more stochasticity across simulations in static landscapes D and E, which is also reflected in the different specialist endpoints reached as shown in Fig. 4b. Landscape E is unique in that the fitness peaks are defined by both generalists and L-specialists (see Fig. 3e); the evolutionary trajectories of SI most often equilibrate to a very slightly negative SI value corresponding to a dominating generalist, but less often also equilibrate to a relatively positive SI corresponding to a dominating L-specialist.

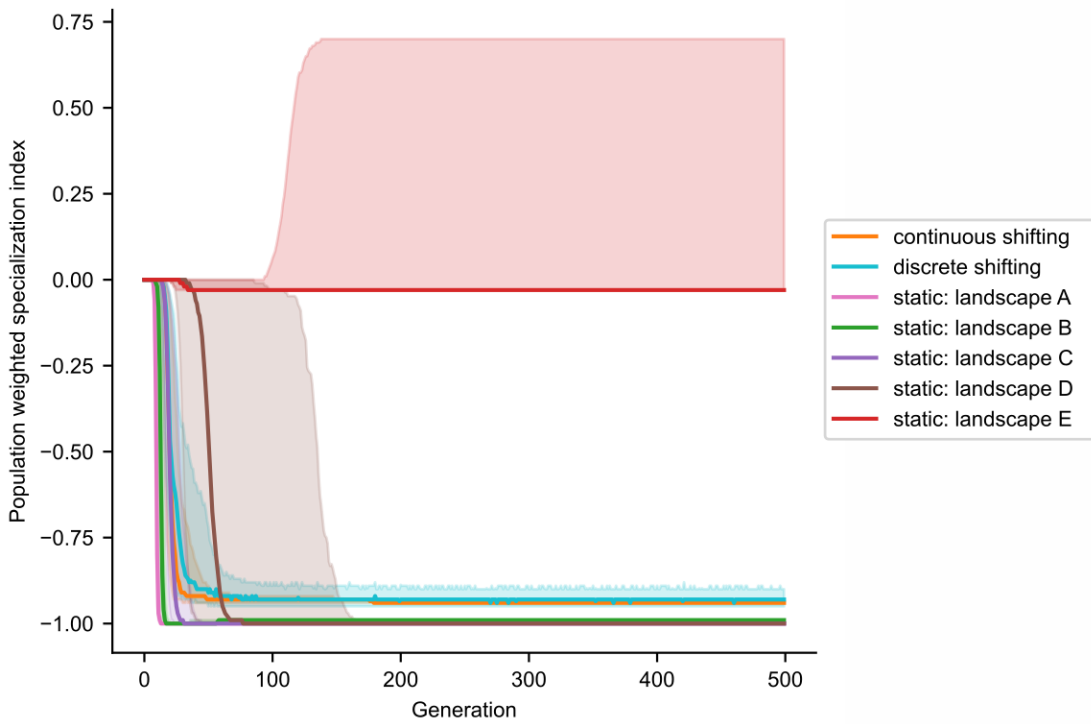

**Supplementary Figure 13: Median and interquartile range of trajectories of simulated population specialization index under each landscape model.** The median SI is shown as a bold line and the shaded region shows the interquartile range. This figure summarizes the individual simulation data trajectories shown in Supplementary Fig. 12.

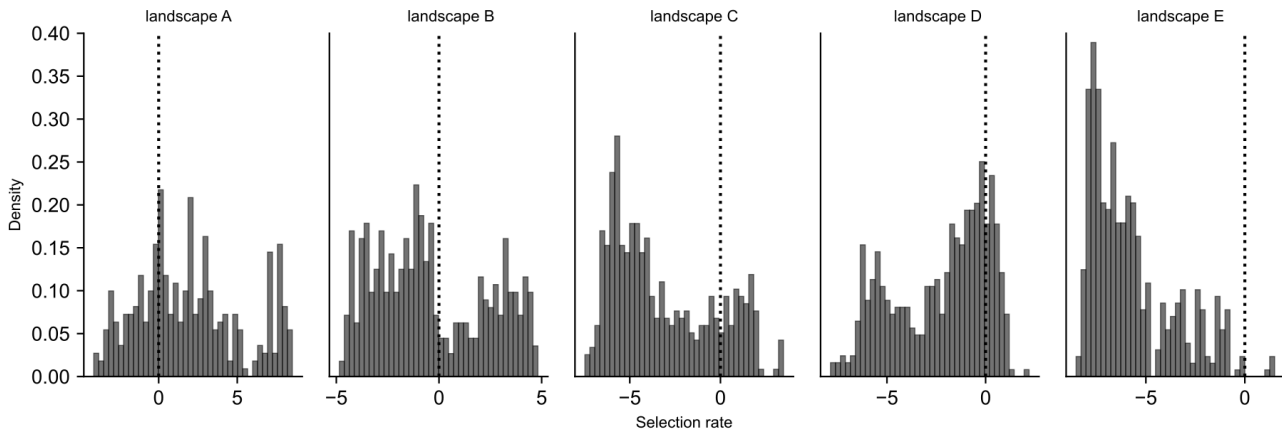

**Supplementary Figure 14: Histograms showing the distribution of fitness effects (DFE) for each landscape.** Each histogram shows the density of genotypes with the specified selection rates for the fitness landscapes as defined in Fig. 3.



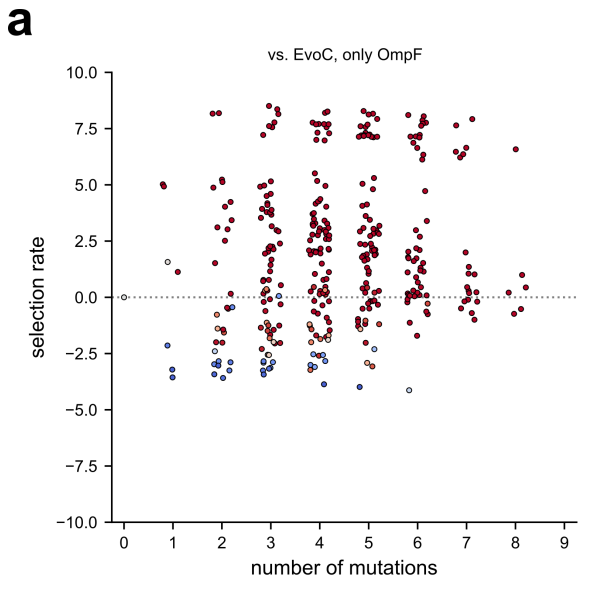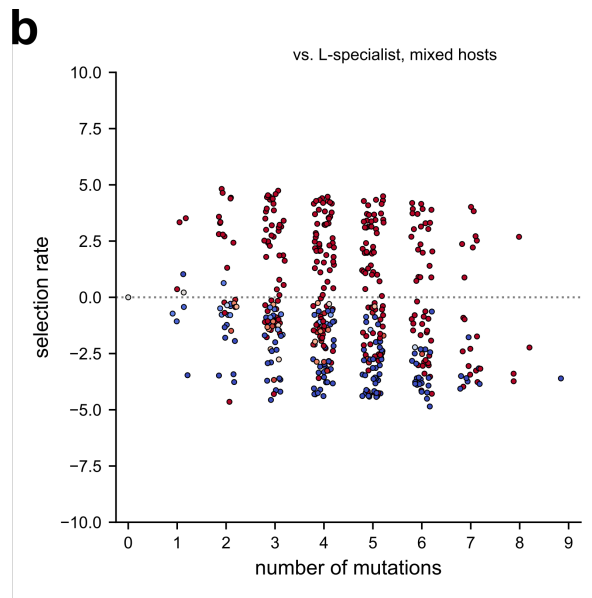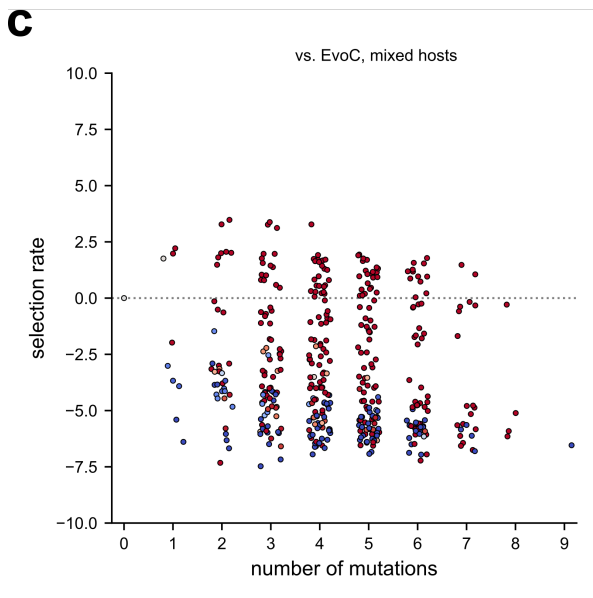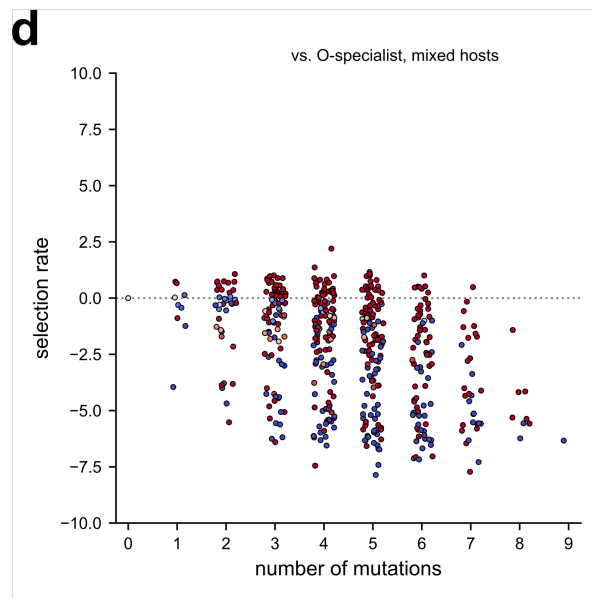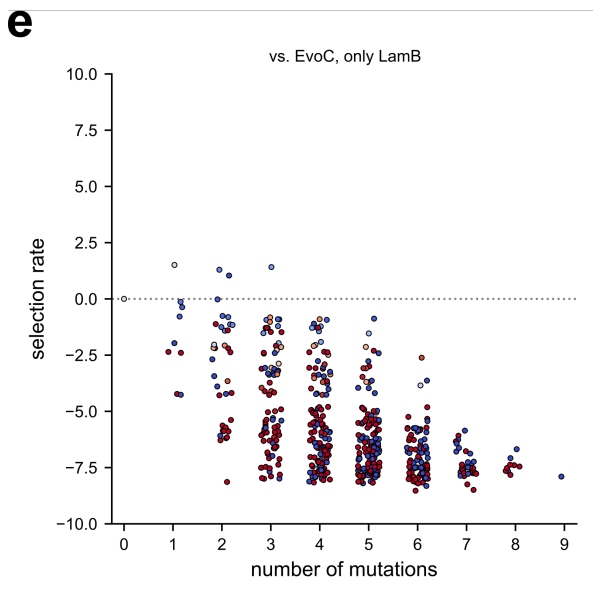

**Supplementary Figure 15: Fitness landscapes as presented in Fig. 3 with modifications for clarity.** Compared to Fig. 3, these plots use smaller points and no lines between neighboring genotypes, for the purposes of better visualizing individual points. Points are colored by specialization index as defined in Figure 2b.
